# Supplementary material for: Transient receptor potential melastatin 4 channel contributes to migration of androgen-insensitive prostate cancer cells
Source: Oncotarget. 2015 Oct 19;6(39):41783–93. doi: 10.18632/oncotarget.6157 (PMC4747188; doi:10.18632/oncotarget.6157)
Supplement: Supplementary file 1 [file oncotarget-06-41783-s001.pdf]

# Transient receptor potential melastatin 4 channel contributes to migration of androgen-insensitive prostate cancer cells

## Supplementary Material

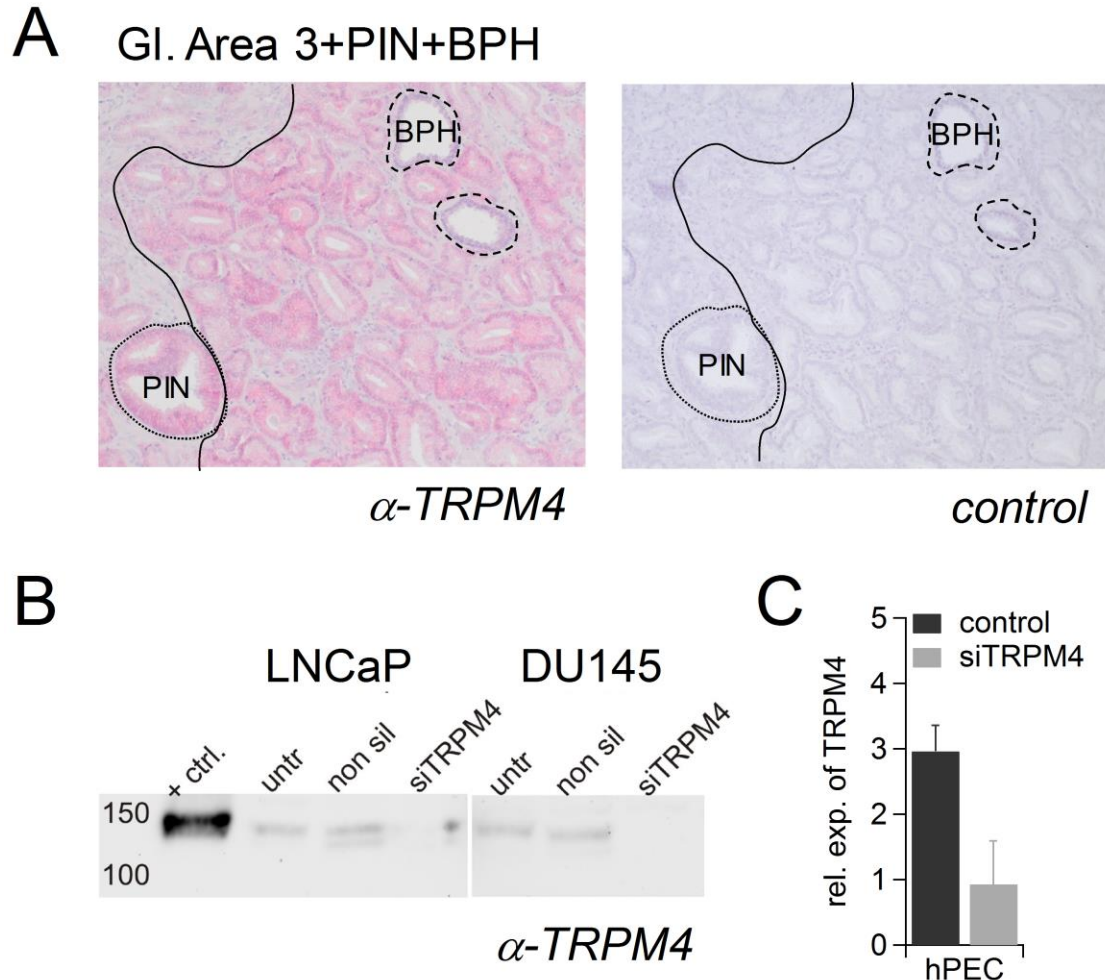

**Supplementary Fig. 1: Specificity of  $\alpha$ -TRPM4 antibody and knockdown efficiency of TRPM4 siRNA.** (A) Immunofluorescence staining for TRPM4 in prostate cancer tissue or control in two consecutive tissue slices. (B) Western blot analysis of TRPM4 protein in LNCaP or DU145 that were non-transfected or transfected with control RNA or siRNA targeting TRPM4. (C) Efficiency of TRPM4 down-regulation by siRNA 72 h after transfection detected by qRT-PCR and normalized to TBP in hPEC ( $n = 3$ ).

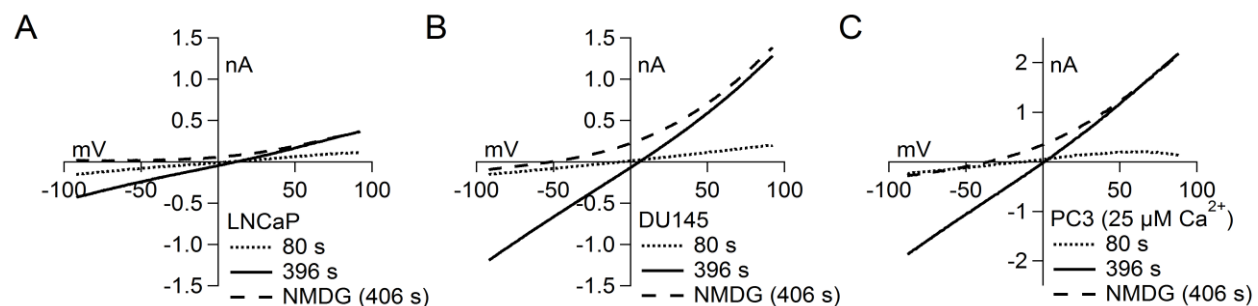

**Supplementary Fig. 2: IV of TRPM4 in non-transfected cells.** (A-C) IV from measurements in LNCaP, DU145 and PC3 cells shown in **Fig. 4B** extracted at indicated time points.

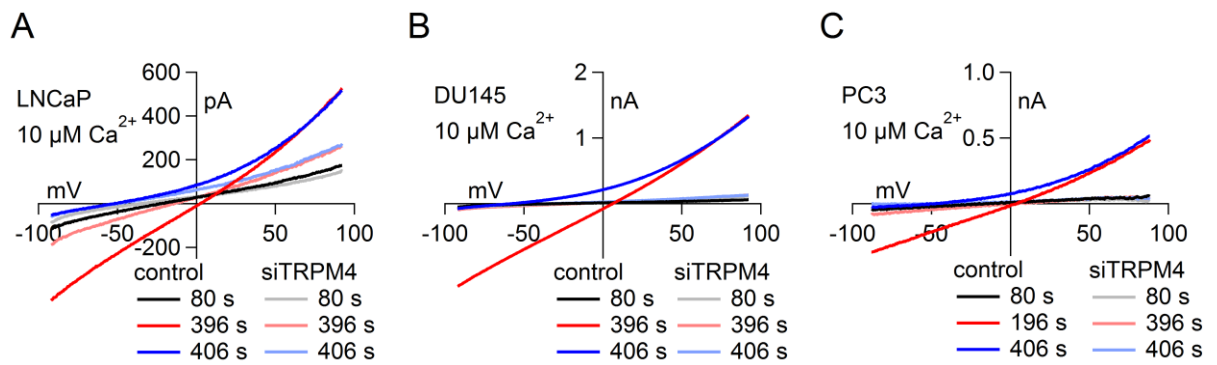

**Supplementary Fig. 3: IV of TRPM4 in transfected cells.** (A-C) IV from measurements in LNCaP, DU145 and PC3 cells shown in **Fig. 4D-F** extracted at indicated time points.

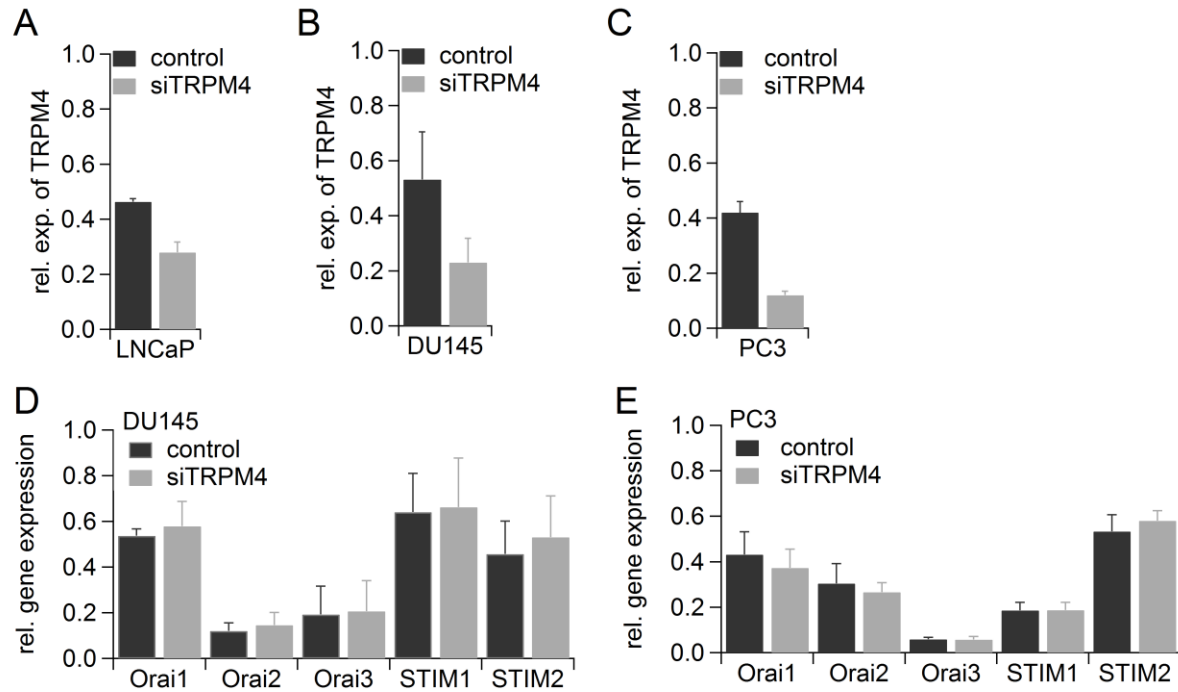

**Supplementary Fig. 4: Knockdown efficiency of TRPM4 on mRNA levels and off-target effects upon knockdown.** (A-C) Efficiency of TRPM4 down-regulation by siRNA 72 h after transfection when normalized to TBP in LNCaP ( $n = 3$ ), DU145 ( $n = 3$ ) and PC3 cells ( $n = 3$ ) detected by qRT-PCR. (D-E) mRNA levels of Orai1, Orai2, Orai3, STIM1 and STIM2 upon knockdown of TRPM4 ( $n = 3$ ).

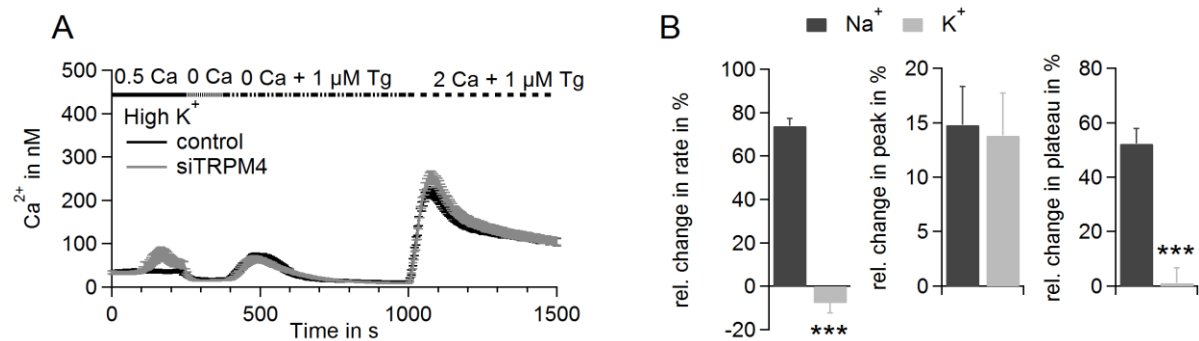

**Supplementary Fig. 5: SOCE in DU145 upon knockdown of TRPM4 when external Na<sup>+</sup> was replaced with K<sup>+</sup>.** (A) Tg-induced SOCE in DU145 transfected with control RNA (black,  $n = 126$ ) or TRPM4 siRNA (grey,  $n = 137$ ) 72 h after transfection measured in a Fura-2-based Ca<sup>2+</sup> readdition protocol when extracellular Na<sup>+</sup> was replaced by K<sup>+</sup>. (B) Relative changes in Ca<sup>2+</sup> entry rate, peak and plateau of SOCE upon knockdown of TPRM4 under standard conditions (Na<sup>+</sup>, black bars, from cells in **Fig. 5A**) or when Na<sup>+</sup> was replaced by K<sup>+</sup> (grey bars, from cells in **SFig. 5A**).

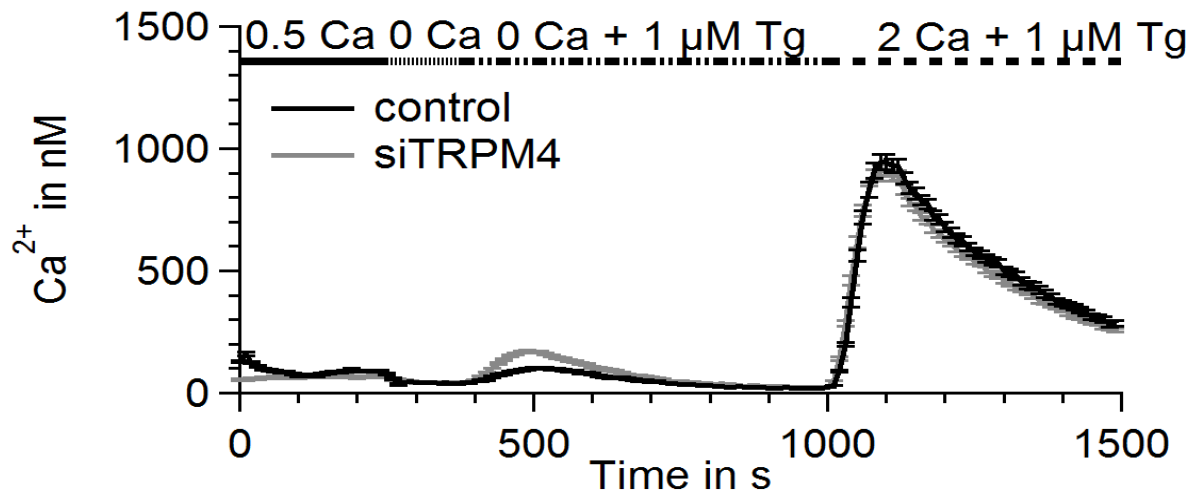

**Supplementary Fig. 6: SOCE in PC3 upon knockdown of TRPM4.** (A) Tg-induced SOCE in PC3 transfected with control RNA (black,  $n = 292$ ) or TRPM4 siRNA (grey,  $n = 358$ ) 72 h after transfection measured in a Fura-2-based Ca<sup>2+</sup> readdition protocol.

**Supplementary Table 1**

Clinical characteristics and signal intensity of TRPM4 immune reactivity in prostate carcinoma tissue

| <b>case</b> | <b>Gleason Score</b> | <b>T stage</b> | <b>N</b> | <b>M</b> | <b>Tumor</b> | <b>PIN</b> | <b>BPH</b> |
|-------------|----------------------|----------------|----------|----------|--------------|------------|------------|
| PCA001      | 3+2=5                | pT4            | N0       | M0       | ++           | ++         | +-         |
| PCA002      | 4+3=7                | pT3b           | N0       | M0       | +++          | +++        | n.e.       |
| PCA003      | 4+3=7                | pT3a           | N0       | M0       | +++          | +++        | +          |
| PCA004      | 4+3=7                | pT3a           | N0       | M0       | +++          | +++        | +          |
| PCA005      | 4+3=7                | pT3a           | N0       | M0       | ++           | ++         | -          |
| PCA006      | 4+3=7                | pT2c           | N0       | M0       | ++           | +++        | -          |
| PCA007      | 3+4=7                | pT2c           | N0       | M0       | +++          | +++        | ++         |
| PCA008      | 4+5=9                | pT3b           | N0       | M0       | ++           | +++        | +          |
| PCA009      | 4+3=7                | pT3a(est)      | N0       | M0       | ++           | ++         | -          |
| PCA010      | 4+3=7                | pT3a(est)      | N0       | M0       | ++           | ++         | -          |
| PCA011      | 3+4=7                | pT2c           | N0       | M0       | ++           | ++         | n.e.       |
| PCA012      | 3+4=7                | pT3a(est)      | N0       | M0       | +++          | ++         | n.e.       |
| PCA013      | 5+4=9                | pT2c           | N0       | M0       | +++          | ++         | -          |
| PCA014      | 3+4=7                | pT2c           | N0       | M0       | +++          | ++         | -          |
| PCA015      | 3+4=7                | pT2c           | N0       | M0       | +++          | ++         | -          |
| PCA016      | 3+4=7                | pT3b           | N0       | M0       | +++          | ++         | -          |
| PCA017      | 4+4=8                | pT2a           | N0       | M0       | +++          | ++         | +          |
| PCA018      | 3+4=7                | pT2c           | N0       | M0       | +++          | ++         | -          |
| PCA019      | 3+4=7                | pT2c           | N0       | M0       | +++          | +          | -          |
| PCA020      | 3+3=6                | pT2c           | N0       | M0       | +++          | +          | -          |
